# Supplementary material for: Sustainable Agriculture Practices: Utilizing Composted Sludge Fertilizer for Improved Crop Yield and Soil Health
Source: MDPI journal article supplement (doi:10.3390/agronomy14040756), 2024-04-06
Supplement: s1 [file s1]

Archive with 1 entries (1 files):
- agronomy-2929663-supplementary.pdf
