# Supplementary material for: Sustainable Agriculture Practices: Utilizing Composted Sludge Fertilizer for Improved Crop Yield and Soil Health
Source: MDPI journal article supplement (doi:10.3390/agronomy14040756), 2024-04-06
Supplement: s1 [file s1 › agronomy-2929663-supplementary.pdf]

## Supplementary Information for Publication

### Sustainable Agriculture Practices: Utilizing Composted Sludge Fertilizer for Improved Crop Yield and Soil Health

Lijun Li 1, 2, He Li 3, Lihong Tong 4 and Yizhong Lv 1 \*

1 Department of Soil and Water Sciences, College of Land Science and Technology,

China Agricultural University, Beijing 100193, China; lilijun@caas.cn

2 Organic Recycling Institute (Suzhou) , Wuzhong District, Suzhou 215128, China

3 Xinjiang Huiguang Optoelectronic Technology Limited Company, Korla 841000, China; lihe@orica.cn

4 State Key Laboratory of Hydrosience and Engineering, Department of Hydraulic Engineering,

Tsinghua University, Beijing 100084, China; tonglihong@mail.tsinghua.edu.cn

\* Correspondence: lyz@cau.edu.cn; Tel.: +86-010-62731431

Number of pages: 5

Number of tables: 4

#### Contents

**Table S1** The membership degree of the evaluation alternatives

**Table S2** Load count of different soil indicators

**Table S3** Different weights of evaluation indexes

**Table S4** Soil health comprehensive evaluation index in different fertilizer treatments

**Table S1 The membership degree of the evaluation alternatives**

| <b>Treatment</b> | <b>Soil bulk density</b> | <b>Field capacity</b> | <b>Soil moisture content</b> | <b>Soil porosity</b> | <b>pH</b>  | <b>Eh</b>               | <b>CEC</b>           | <b>SOC</b>         | <b>MWD</b>              | <b>GMD</b>                | <b>D</b>    |
|------------------|--------------------------|-----------------------|------------------------------|----------------------|------------|-------------------------|----------------------|--------------------|-------------------------|---------------------------|-------------|
| CK               | 0.00                     | 0.00                  | 1.00                         | 0.00                 | 0.08       | 0.00                    | 0.00                 | 0.00               | 0.54                    | 0.96                      | 0.00        |
| CF               | 1.00                     | 1.00                  | 0.00                         | 1.00                 | 1.00       | 0.29                    | 1.00                 | 0.42               | 0.00                    | 0.00                      | 1.00        |
| WS               | 0.49                     | 0.51                  | 0.84                         | 0.49                 | 0.86       | 0.60                    | 0.54                 | 1.00               | 1.00                    | 1.00                      | 0.90        |
| WD               | 0.61                     | 0.98                  | 0.49                         | 0.61                 | 0.00       | 1.00                    | 0.62                 | 0.55               | 0.63                    | 0.79                      | 0.76        |
| <b>Treatment</b> | <b>TN</b>                | <b>TP</b>             | <b>TK</b>                    | <b>AP</b>            | <b>AK</b>  | <b>C/N</b>              | <b>Active carbon</b> | <b>Slow carbon</b> | <b>Resistant carbon</b> | <b>Microbial quotient</b> | <b>SMBN</b> |
| CK               | 0.00                     | 0.00                  | 0.00                         | 0.00                 | 0.16       | 0.00                    | 0.00                 | 0.00               | 0.00                    | 0.00                      | 0.62        |
| CF               | 0.36                     | 0.64                  | 0.46                         | 0.46                 | 0.00       | 0.25                    | 0.22                 | 0.21               | 0.09                    | 0.75                      | 0.00        |
| WS               | 0.82                     | 0.64                  | 0.59                         | 0.41                 | 1.00       | 0.37                    | 0.57                 | 1.00               | 0.39                    | 1.00                      | 1.00        |
| WD               | 1.00                     | 1.00                  | 1.00                         | 1.00                 | 0.77       | 1.00                    | 1.00                 | 0.39               | 1.00                    | 0.71                      | 0.03        |
| <b>Treatment</b> | <b>Catalase</b>          | <b>SAC</b>            | <b>DEH</b>                   | <b>URE</b>           | <b>ALP</b> | <b>Gene copy number</b> |                      |                    |                         |                           |             |
| CK               | 0.00                     | 0.00                  | 0.00                         | 0.00                 | 0.21       | 0.00                    |                      |                    |                         |                           |             |
| CF               | 1.00                     | 0.07                  | 1.00                         | 1.00                 | 0.39       | 0.83                    |                      |                    |                         |                           |             |
| WS               | 0.75                     | 0.41                  | 0.36                         | 0.62                 | 0.00       | 1.00                    |                      |                    |                         |                           |             |
| WD               | 0.00                     | 1.00                  | 0.84                         | 0.62                 | 1.00       | 0.31                    |                      |                    |                         |                           |             |

Note: Soil total carbon was represented by SOC (g/kg). Mean weight diameter was represented by MWD. Mean geometric diameter was represented by GMD. Fractal dimension was represented by D. Soil total nitrogen was represented by TN (g/kg). Soil total phosphorus was represented by TP (g/kg). Soil total potassium was represented by TK (g/kg). Soil available phosphorus was represented by AP (g/kg). Soil available potassium was represented by AK (g/kg). Alkali phosphatase activity was represented by ALP (Phenol mg/g). Invertase activity was

represented by SAC (Glucose mg/g). Soil dehydrogenase activity was represented by DEH (TPF ug/g). Urease activity was represented by URE (NH<sub>4</sub><sup>+</sup>-N, mg/g). Soil microbial nitrogen was represented by SMBN (mg/kg).

**Table S2 Load count of different soil indicators**

| Soil indicators       | First principal component | Second principal component | Third principal component | Fourth principal component | Fifth principal component |
|-----------------------|---------------------------|----------------------------|---------------------------|----------------------------|---------------------------|
| Soil bulk density     | 0.918                     | 0.212                      | 0.281                     | 0.174                      | -0.062                    |
| Field capacity        | 0.879                     | 0.125                      | 0.314                     | 0.333                      | 0.047                     |
| Soil moisture content | 0.739                     | 0.514                      | 0.340                     | -0.090                     | -0.257                    |
| Soil porosity         | 0.918                     | 0.212                      | 0.281                     | 0.174                      | -0.062                    |
| Eh                    | -0.080                    | 0.583                      | 0.062                     | 0.654                      | -0.471                    |
| pH                    | 0.385                     | 0.914                      | -0.061                    | -0.057                     | -0.095                    |
| CEC                   | 0.818                     | 0.463                      | -0.259                    | 0.219                      | -0.037                    |
| SOC                   | 0.911                     | -0.004                     | 0.205                     | -0.207                     | -0.292                    |
| MWD                   | 0.555                     | -0.654                     | 0.469                     | 0.185                      | 0.099                     |
| GMD                   | 0.546                     | -0.637                     | 0.494                     | 0.217                      | 0.068                     |
| D                     | 0.472                     | -0.616                     | 0.537                     | 0.309                      | -0.118                    |
| TN                    | 0.962                     | -0.149                     | -0.114                    | 0.121                      | -0.156                    |
| TP                    | 0.897                     | -0.090                     | -0.178                    | -0.010                     | -0.395                    |
| TK                    | 0.788                     | -0.465                     | -0.373                    | -0.153                     | 0.021                     |
| AP                    | 0.726                     | -0.164                     | -0.501                    | -0.053                     | 0.439                     |
| AK                    | 0.987                     | -0.006                     | -0.102                    | -0.099                     | -0.078                    |
| C/N                   | 0.494                     | 0.192                      | 0.471                     | -0.632                     | -0.313                    |
| Active carbon         | 0.927                     | -0.298                     | 0.014                     | -0.028                     | 0.226                     |
| Slow carbon           | 0.964                     | -0.178                     | 0.072                     | -0.119                     | -0.140                    |

|                    |        |        |        |        |        |
|--------------------|--------|--------|--------|--------|--------|
| Resistant carbon   | 0.963  | -0.022 | -0.149 | -0.196 | 0.106  |
| Microbial quotient | 0.358  | 0.903  | 0.074  | 0.020  | 0.226  |
| SMBN               | 0.645  | 0.251  | -0.544 | 0.472  | -0.043 |
| Catalase           | -0.097 | 0.966  | 0.063  | 0.059  | 0.223  |
| SAC                | 0.883  | 0.118  | 0.018  | -0.015 | 0.454  |
| DEH                | -0.256 | 0.003  | 0.660  | 0.573  | 0.412  |
| URE                | 0.305  | 0.784  | 0.092  | -0.502 | 0.179  |
| ALP                | 0.851  | -0.245 | -0.283 | 0.246  | 0.275  |
| Gene copy number   | 0.992  | 0.012  | 0.059  | -0.105 | 0.025  |

Note: Soil total carbon was represented by SOC (g/kg). Mean weight diameter was represented by MWD. Mean geometric diameter was represented by GMD. Fractal dimension was represented by D. Soil total nitrogen was represented by TN (g/kg). Soil total phosphorus was represented by TP (g/kg). Soil total potassium was represented by TK (g/kg). Soil available phosphorus was represented by AP (g/kg). Soil available potassium was represented by AK (g/kg). Alkali phosphatase activity was represented by ALP (Phenol mg/g). Invertase activity was represented by SAC (Glucose mg/g). Soil dehydrogenase activity was represented by DEH (TPF ug/g). Urease activity was represented by URE (NH<sub>4</sub><sup>+</sup>-N, mg/g). Soil microbial nitrogen was represented by SMBN (mg/kg).

**Table S3 Different weights of evaluation indexes**

| Soil indicators       | Weight | Soil indicators    | Weight |
|-----------------------|--------|--------------------|--------|
| Soil bulk density     | 0.0471 | Active carbon      | 0.0315 |
| Field capacity        | 0.0477 | Slow carbon        | 0.0310 |
| Soil moisture content | 0.0420 | Resistant carbon   | 0.0329 |
| Soil porosity         | 0.0471 | Microbial quotient | 0.0393 |
| Eh                    | 0.0158 | SMBN               | 0.0287 |
| pH                    | 0.0335 | Catalase           | 0.0235 |
| CEC                   | 0.0413 | SAC                | 0.0425 |
| SOC                   | 0.0321 | DEH                | 0.0142 |
| MWD                   | 0.0177 | URE                | 0.0264 |
| GMD                   | 0.0183 | ALP                | 0.0296 |
| D                     | 0.0158 | Gene copy number   | 0.0386 |
| TN                    | 0.0320 |                    |        |
| TP                    | 0.0251 |                    |        |
| TK                    | 0.0116 |                    |        |
| AP                    | 0.0206 |                    |        |
| AK                    | 0.0342 |                    |        |
| C/N                   | 0.0182 |                    |        |

Note: Soil total carbon was represented by SOC (g/kg). Mean weight diameter was represented by MWD. Mean geometric diameter was represented by GMD. Fractal dimension was represented by D. Soil total nitrogen was represented by TN (g/kg). Soil total phosphorus was represented by TP (g/kg). Soil total potassium was represented by TK (g/kg). Soil available phosphorus was represented by AP (g/kg). Soil available potassium was represented by AK (g/kg).

**TableS4 Soil health comprehensive evaluation index in different fertilizer treatments**

| Treatment | CK   | CF   | WS   | WD   |
|-----------|------|------|------|------|
| SHI       | 0.06 | 0.45 | 0.71 | 0.79 |
